# Supplementary material for: Effective luminescence sensing of Fe3+, Cr2O72−, MnO4− and 4-nitrophenol by lanthanide metal–organic frameworks with a new topology type
Source: Royal Society of Chemistry journal article supplement (doi:10.1039/c9dt01907c), 2019-01-01
Supplement: c9dt01907c1.pdf [file c9dt01907c1.pdf]

## Electronic Supplementary Information

# Effective Luminescence Sensing of $\text{Fe}^{3+}$ , $\text{Cr}_2\text{O}_7^{2-}$ , $\text{MnO}_4^-$ and 4-nitrophenol by A New Topology Type of Lanthanide Metal-organic Frameworks

Jing-jing Ma <sup>a</sup> and Wei-sheng Liu

<sup>a</sup> Key Laboratory of Nonferrous Metal Chemistry and Resources Utilization of Gansu Province and State Key Laboratory of Applied Organic Chemistry, Key Laboratory of Special unction Materials and Structure Design, Ministry of Education, College of Chemistry and Chemical Engineering, Lanzhou University, Lanzhou, 730000, China.

\* Corresponding authors:

E-mail for W. Liu: liuws@lzu.edu.cn

**Synthesis of isomer of 4, 4'-(((5-carboxy-1,3-phenylene)bis(azanediyl))bis(carbonyl))dibenzoic acid (H<sub>3</sub>L)**

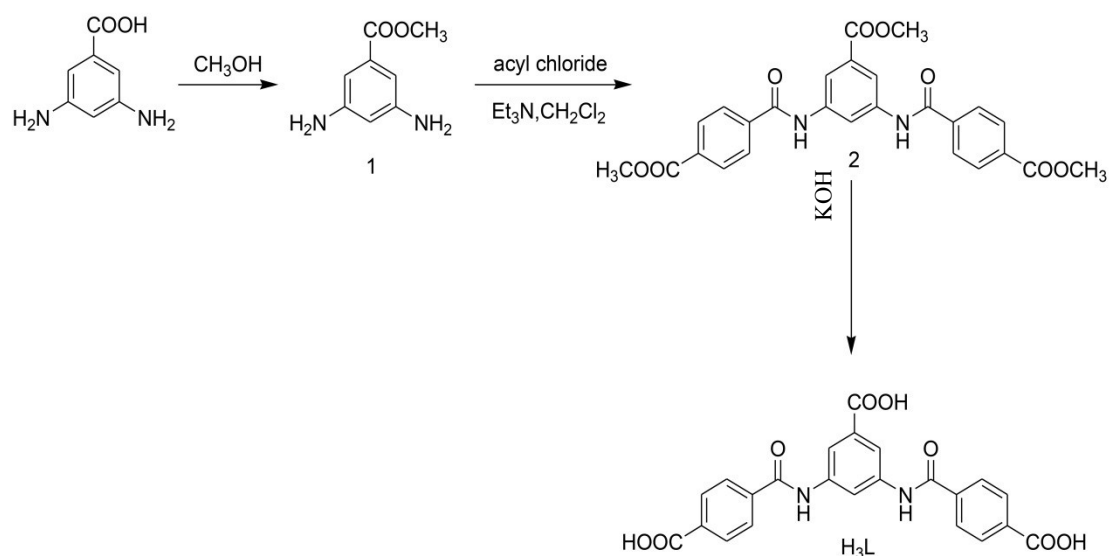

**Scheme S1.** Synthetic procedure for H<sub>3</sub>L.

**Methyl 3, 5-diaminobenzoate (1).**

Under ice-cooling conditions, 1.52g (10mmol) of 3, 5-diaminobenzoic acid was dissolved in 20 mL of a 10% concentrated sulfuric acid-methanol solution, and stirred for 5 min. Reflow at 90°C for 32h. Solvent was removed under reduced pressure, the residue was dissolved in ethyl acetate (60mL) and washed with saturated bicarbonate (3×100mL), and the solvent was removed under reduced pressure to give the desired product **1** as a brown powder (0.82g, 49.4%). <sup>1</sup>H NMR (chloroform-d, 400 MHz, ppm) : δ 6.78 (s, 2H), 6.19 (s, 1H), 4.31 (s, 4H), 3.88 (s, 3H) (**Fig. S25**). ESI-MS: m/z =167.0 [M + H]<sup>+</sup> (**Fig. S26**).

**Dimethyl 4, 4'-(((5-methoxycarbonyl)-1,3-phenylene)bis(azanediyl))bis(carbonyl))dibenzoate (2).**

Under ice-cooling conditions, 0.993g (5mmol) of methyl 4-(chlorocarbonyl) benzoate was dissolved in 20 mL of dichloromethane, and 0.415g (2.5mmol) of methyl 3, 5-diaminobenzoate was added. After stirring for 15 min, 0.75 mL of triethylamine was added dropwise and refluxed at room temperature for 32h. Solvent was removed under reduced pressure, the residue was washed sequentially by (water, saturated sodium bicarbonate, water), and it was naturally dried to give the product **2** as a brown powder (0.41g, 33.5%). <sup>1</sup>H NMR (DMSO-d<sub>6</sub>, 400 MHz, ppm) : δ8.70 (s, 1H), 8.19 (d, 4H), 8.12 (d, 4H), 8.10 (s, 2H), 7.95(s, 2H), 3.91 (s, 9H) (**Fig. S27**). ESI-MS: m/z= 491.4 [M + H]<sup>+</sup> (**Fig. S28**).

**The isomer of 4, 4'-(((5-carboxy-1, 3-phenylene)bis(azanediyl))bis(carbonyl))dibenzoic acid (H<sub>3</sub>L).**

**2** (0.41g, 0.84mmol) was dissolved in methanol (80mL) being clear orange solution. Aqueous solution of KOH (0.234g, 2mL) was added into the above mixture, heating at 85°C for 5h. After

cooling to room temperature, solvent was removed under reduced pressure to give orange solid. The solid were dissolved into water (40mL). Dilute hydrochloric acid was added dropwise to the aqueous with stirring. Lots of yellow particles appeared when the pH value of the solution is about 3. Brown solid H<sub>3</sub>L (0.312g, 83.0%) was obtained by filtration. <sup>1</sup>H NMR (DMSO-d<sub>6</sub>, 400 MHz, ppm): δ 10.59 (s, 3H), 8.62 (s, 1H), 8.14 (s, 2H), 8.06 (d, 4H), 8.04 (d, 4H), 7.99 (s, 2H) (**Fig. S29**). ESI-MS: m/z = 449.4 [M + H]<sup>+</sup> (**Fig. S30**).

**Table S1.** Crystal data and structure refinements for **1**

|                                                              |                                                                                 |
|--------------------------------------------------------------|---------------------------------------------------------------------------------|
| CCDC                                                         | 1904075                                                                         |
| Empirical formula                                            | C <sub>70</sub> H <sub>94</sub> Eu <sub>2</sub> N <sub>10</sub> O <sub>29</sub> |
| Formula weight                                               | 1843.47                                                                         |
| Temperature/K                                                | 100.0(1)                                                                        |
| Crystal system                                               | triclinic                                                                       |
| Space group                                                  | <i>P</i> -1                                                                     |
| <i>a</i> /Å                                                  | 9.75350(10)                                                                     |
| <i>b</i> /Å                                                  | 14.4803(2)                                                                      |
| <i>c</i> /Å                                                  | 15.2219(2)                                                                      |
| $\alpha$ /°                                                  | 87.2780(10)                                                                     |
| $\beta$ /°                                                   | 72.0030(10)                                                                     |
| $\gamma$ /°                                                  | 71.3950(10)                                                                     |
| <i>V</i> /Å <sup>3</sup>                                     | 1934.69(4)                                                                      |
| <i>Z</i>                                                     | 1                                                                               |
| $\rho$ calc/cm <sup>3</sup>                                  | 1.582                                                                           |
| $\mu$ /mm                                                    | 12.245                                                                          |
| <i>F</i> (000)                                               | 942.0                                                                           |
| Crystal size/mm <sup>3</sup>                                 | 0.25 × 0.16 × 0.15                                                              |
| Radiation Cu K $\alpha$                                      | ( $\lambda$ = 1.54184)                                                          |
| 2 $\theta$ range for data collection/°                       | 6.114 to 149.064                                                                |
| Index ranges                                                 | -12 ≤ <i>h</i> ≤ 12, -18 ≤ <i>k</i> ≤ 18, -18 ≤ <i>l</i> ≤ 18                   |
| Reflections collected                                        | 71823                                                                           |
| Independent reflections                                      | 7793 [ <i>R</i> <sub>int</sub> = 0.0520, <i>R</i> <sub>sigma</sub> = 0.0254]    |
| Data/restraints/parameters                                   | 7793/89/624                                                                     |
| Goodness-of-fit on <i>F</i> <sup>2</sup>                     | 1.090                                                                           |
| Final <i>R</i> indexes [ <i>I</i> ≥ 2 $\sigma$ ( <i>I</i> )] | <i>R</i> <sub>1</sub> = 0.0426, <i>wR</i> <sub>2</sub> = 0.1163                 |
| Final <i>R</i> indexes [all data]                            | <i>R</i> <sub>1</sub> = 0.0434, <i>wR</i> <sub>2</sub> = 0.1171                 |
| Largest diff. peak/hole / e Å <sup>-3</sup> 1.96/-1.56       |                                                                                 |

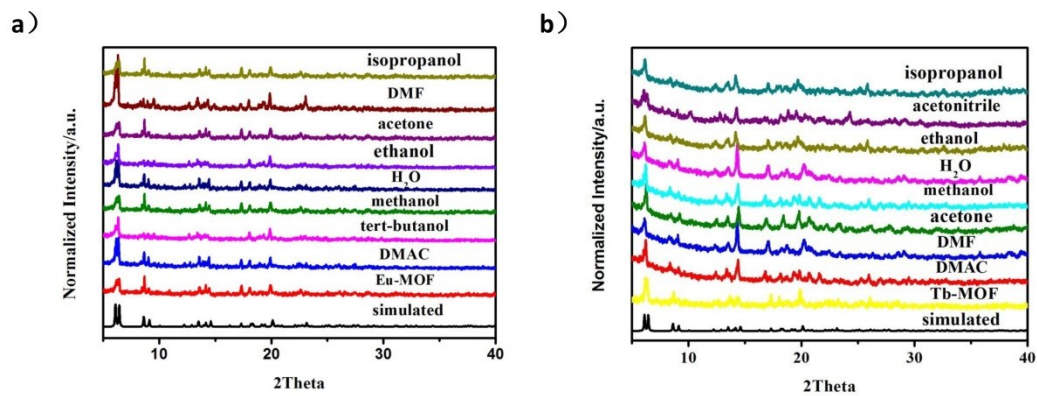

**Fig.S1** (a) PXRD patterns of complex1 in different solvents. (b) PXRD patterns of complex2 in different solvents.

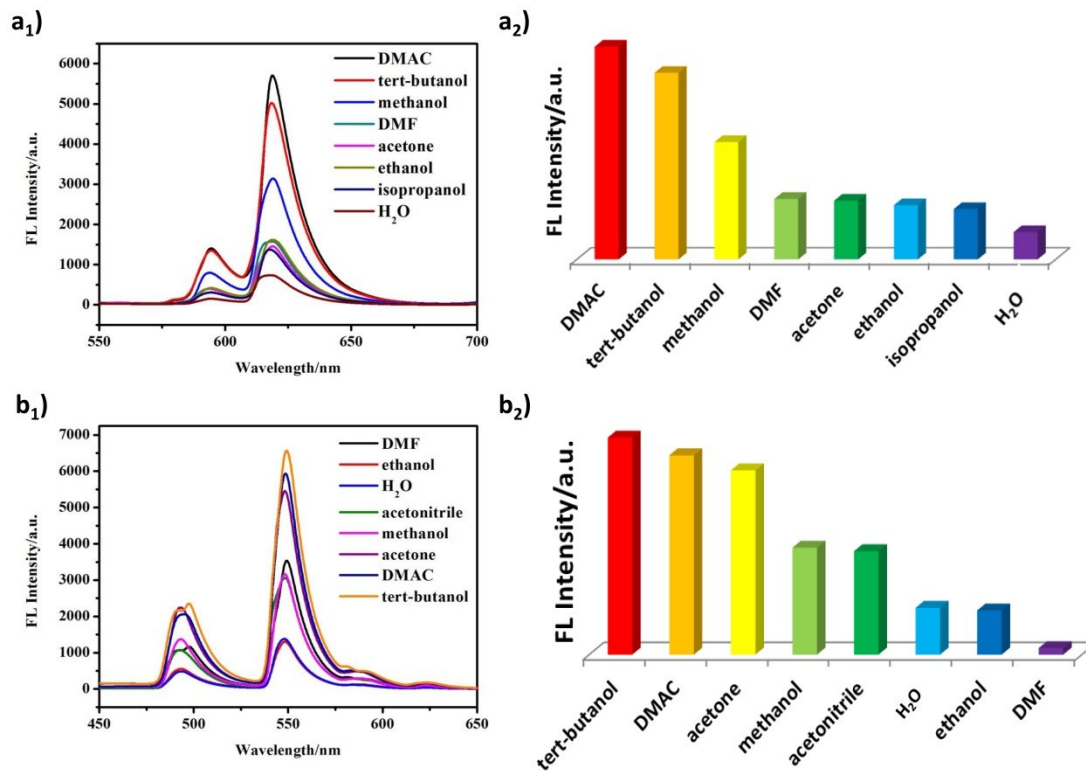

**Fig.S2** (a) Luminescence intensity at 619nm of complex1 in different solvents.(b)Luminescence intensity at 548nm of complex2 in different solvents.

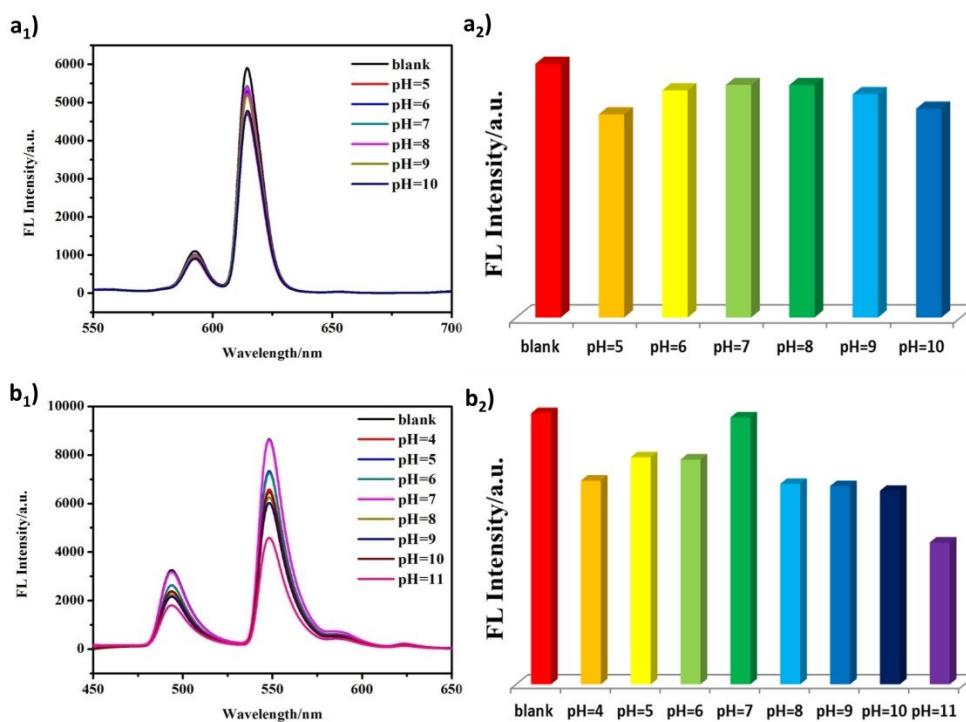

**Fig.S3** (a) Luminescence intensity at 619nm of complex<sub>1</sub> in different pH aqueous solutions. (b) Luminescence intensity at 548nm of complex<sub>2</sub> in different pH aqueous solutions.

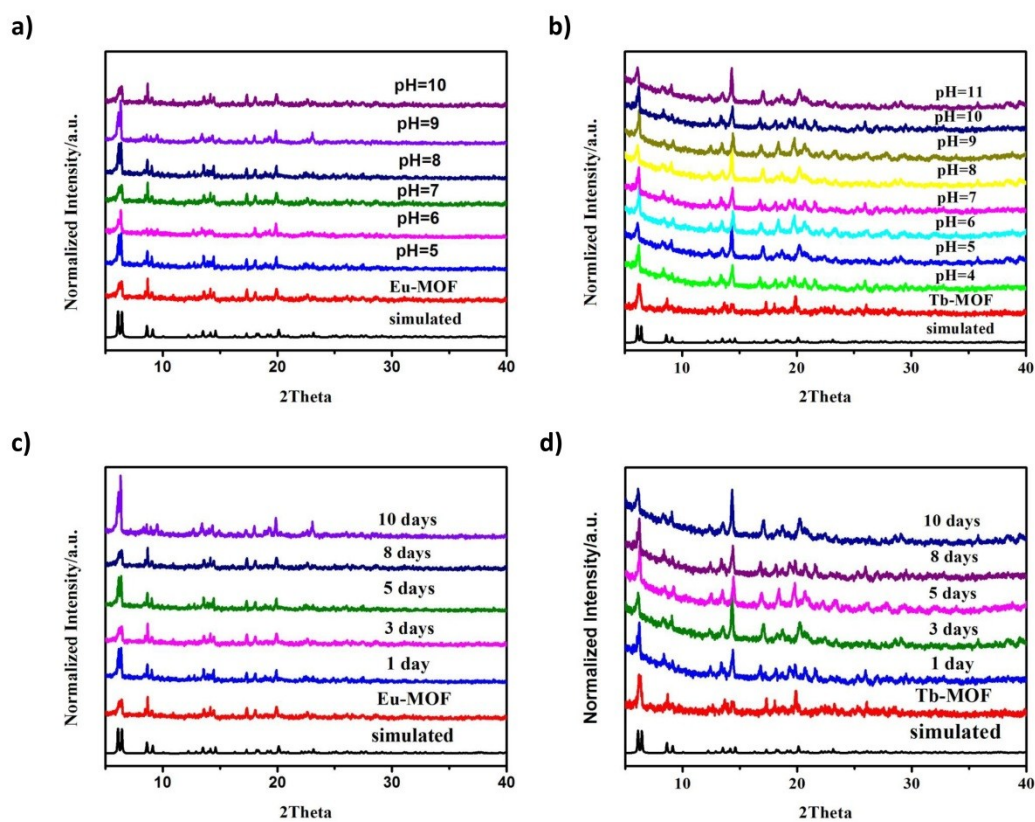

**Fig.S4** (a) PXRD patterns of complex<sub>1</sub> in different pH aqueous solvents. (b) PXRD patterns of complex<sub>2</sub> in different pH aqueous solvents. (c) Complex<sub>1</sub> was placed in water for different days of PXRD patterns. (d) Complex<sub>2</sub> was placed in water for different days of PXRD patterns.

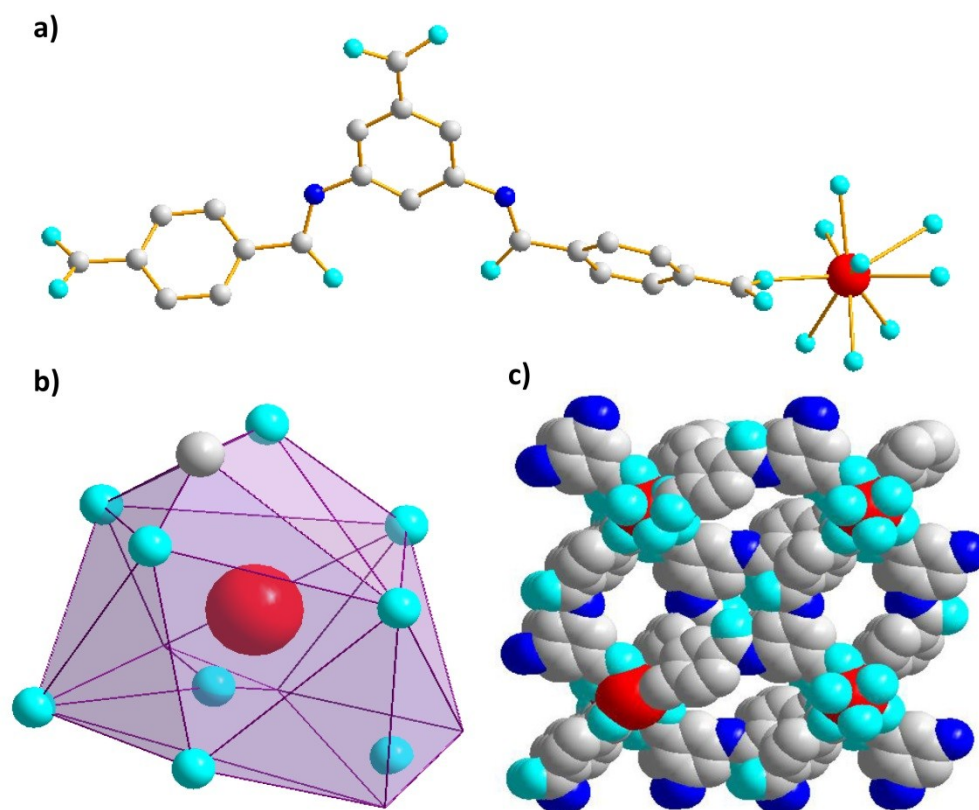

**Fig.S5** (a) The asymmetric unit of complex**1**. All hydrogen atoms and solvent molecules are omitted. (b) Coordination polyhedrons of  $\text{Eu}^{3+}$  ions. (c) 3D framework shown in space-filling mode along the a-axis.

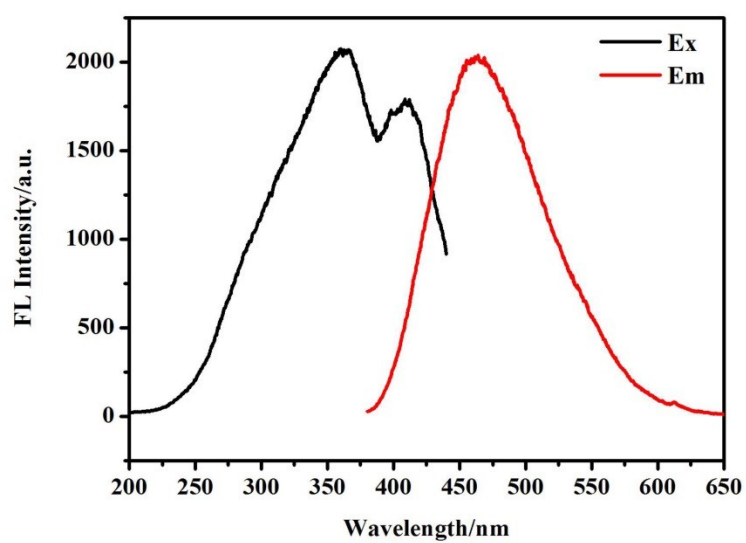

**Fig.S6** Solid-state excitation and emission spectra of  $\text{H}_3\text{L}$  at room temperature ( $\lambda_{\text{ex}} = 353\text{nm}$ ).

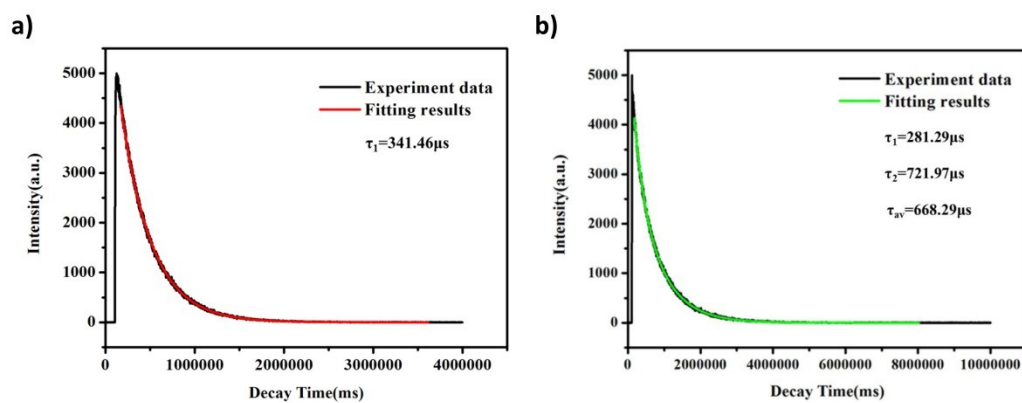

Fig.S7 (a) Decay time of complex1. (b) Decay time of complex2.

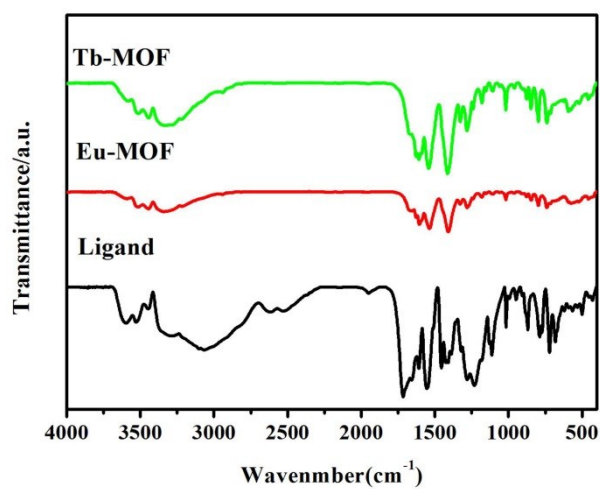

Fig.S8 IR spectrum of complexes 1-2 and ligand.

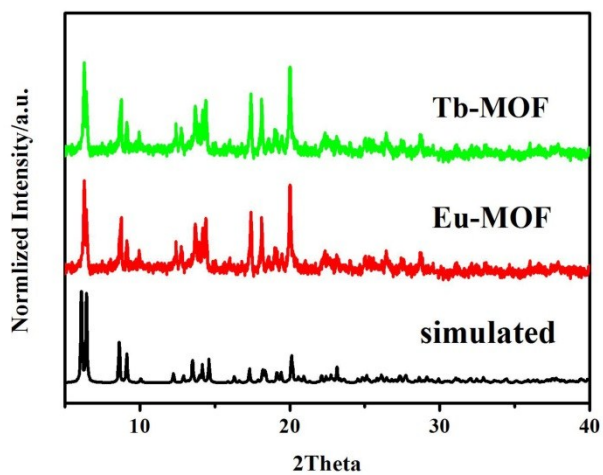

Fig.S9 PXRD patterns of complexes1-2.

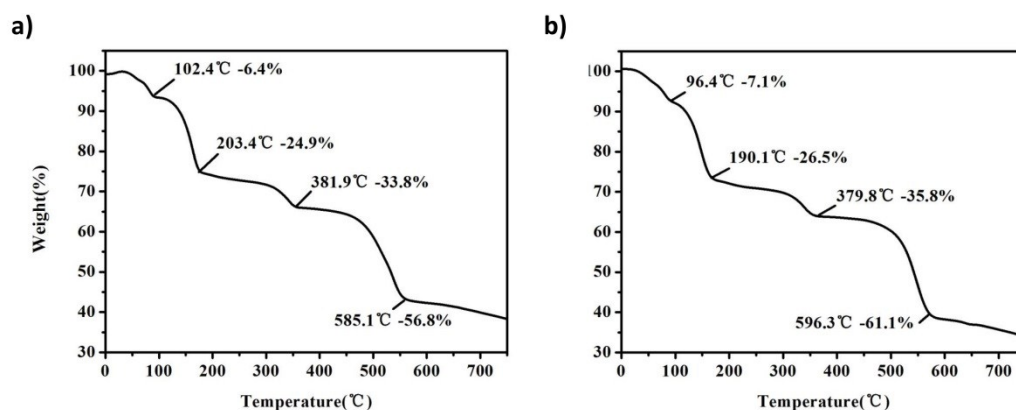

Fig.S10 (a) TGA curve of complex1. (b) TGA curve of complex2.

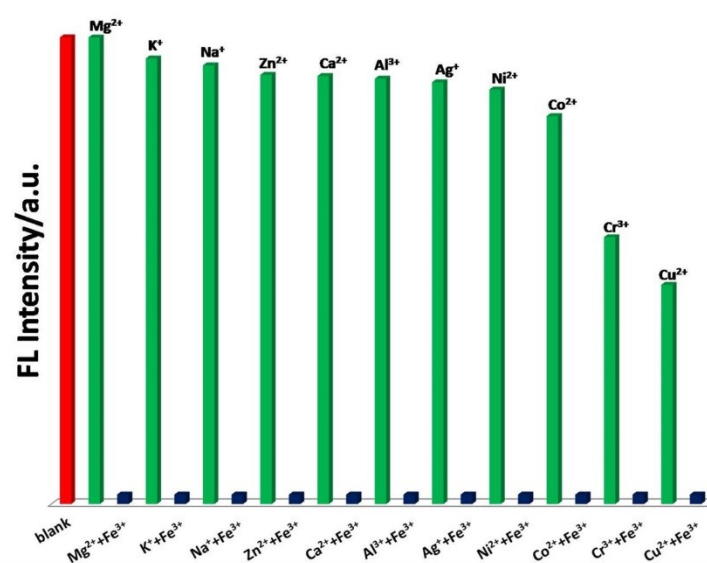

Fig.S11 Luminescence intensity of the complex1 dispersed in aqueous solution in the presence of different cations (green) or a mixture of other cations with Fe<sup>3+</sup> (blue).

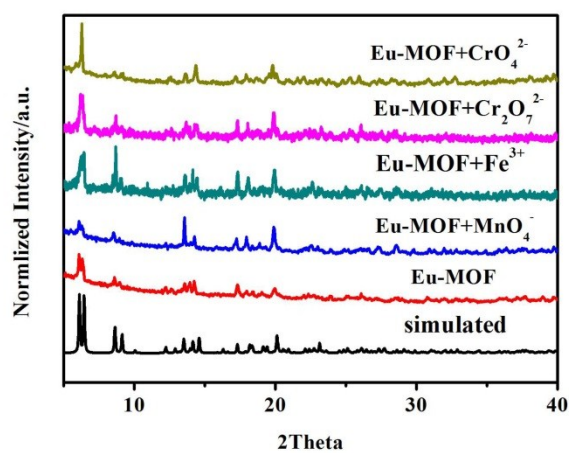

Fig.S12 PXRD patterns of complex1 in aqueous solutions of toxic substance.



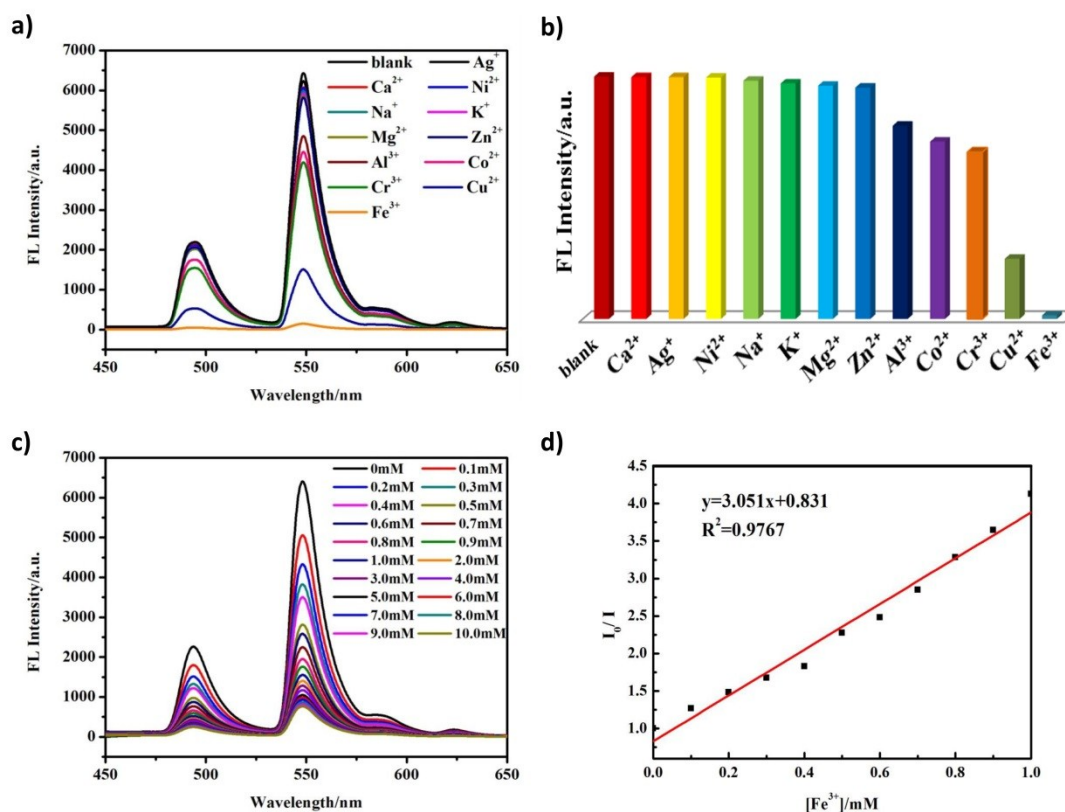

**Fig.S13** (a) Luminescence intensity at 548nm of complex2 dispersed in the aqueous solutions of different cations upon excitation at 339nm. (b) Cations selectivity of complex2 ( $I_0 / I$ ) in H<sub>2</sub>O. (c) Luminescence responses of complex2 toward different concentrations of Fe<sup>3+</sup> (0-1.0mM) in H<sub>2</sub>O ( $\lambda_{ex} = 339$  nm). (d) Stern-Volmer plot of  $I_0 / I$  versus increasing concentrations of Fe<sup>3+</sup>.

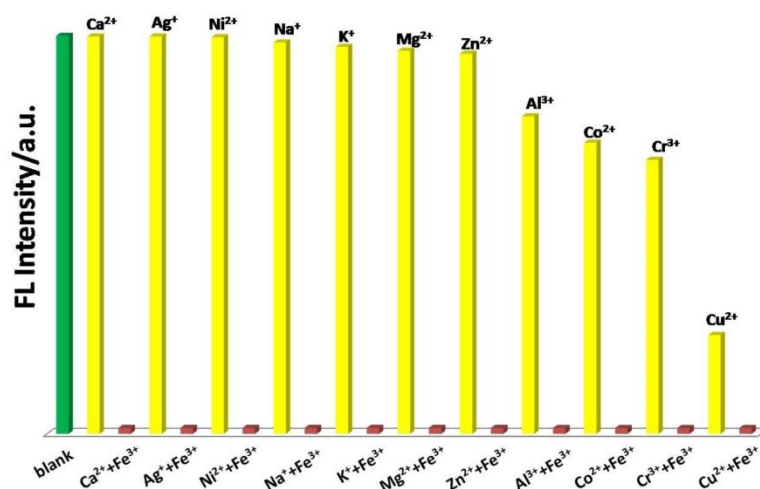

**Fig.S14** Luminescence intensity of the complex2 dispersed in aqueous solution in the presence of different cations (yellow) or a mixture of other cations with Fe<sup>3+</sup> (red).

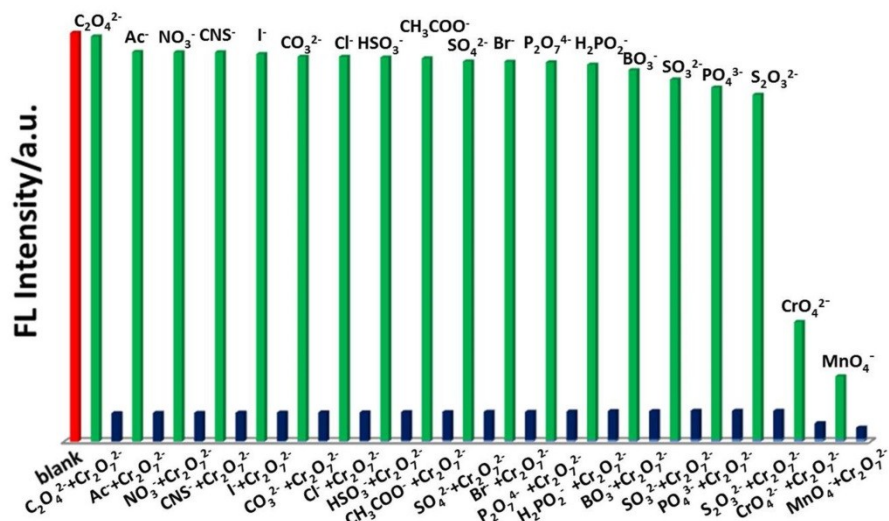

Fig.S15 Luminescence intensity of the complex1 dispersed in aqueous solution in the presence of different anions (green) or a mixture of other anions with  $Cr_2O_7^{2-}$  (blue).

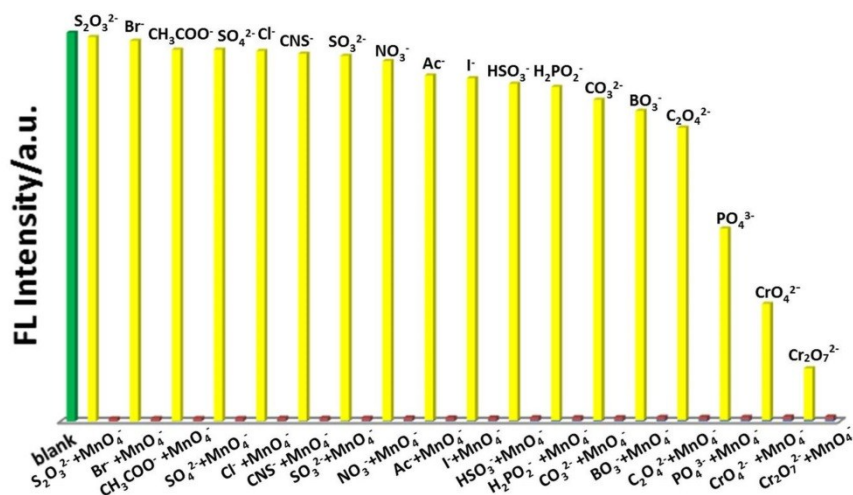

Fig.S16 Luminescence intensity of the complex2 dispersed in aqueous solution in the presence of different anions (yellow) or a mixture of other anions with  $MnO_4^-$  (red).

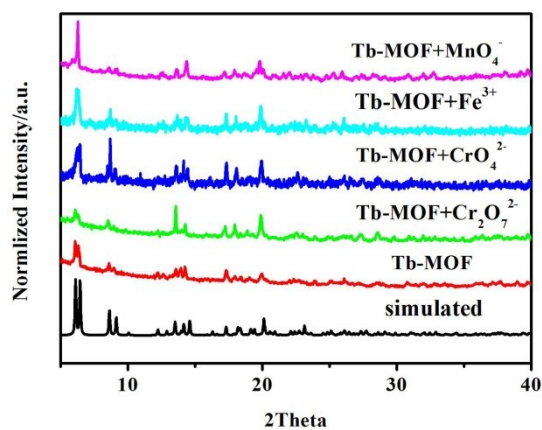

Fig.S17 PXRD patterns of complex2 in aqueous solutions of toxic substance.

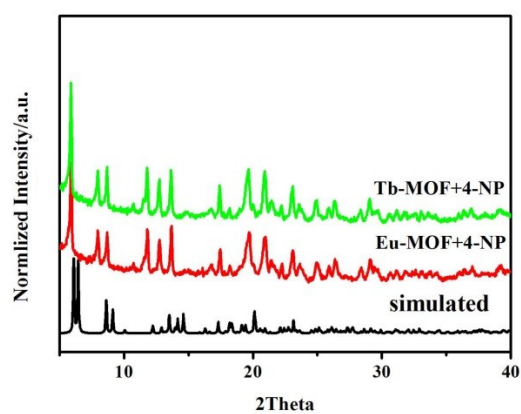

Fig.S18 PXRD patterns of complexes1-2 in aqueous solutions of 4-NP.

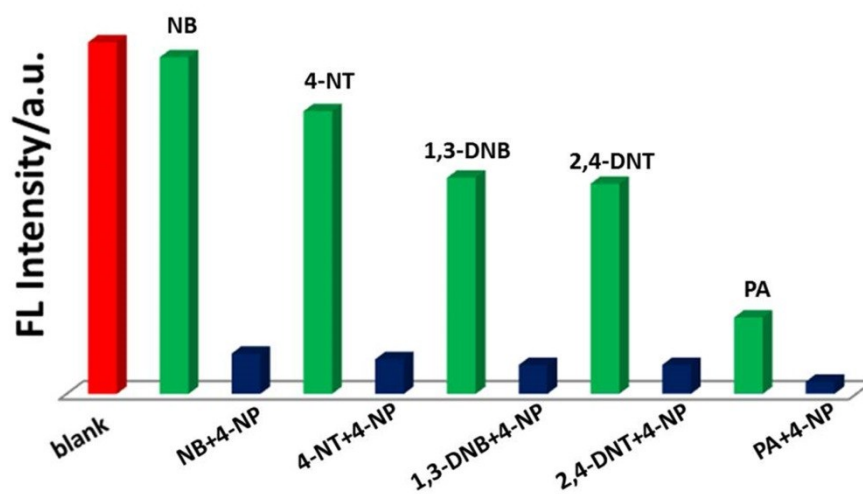

Fig.S19 Luminescence intensity of the complexe1 dispersed in aqueous solution in the presence of different nitro aromatic compounds (green) or a mixture of other nitro aromatic compounds with 4-NP (blue).

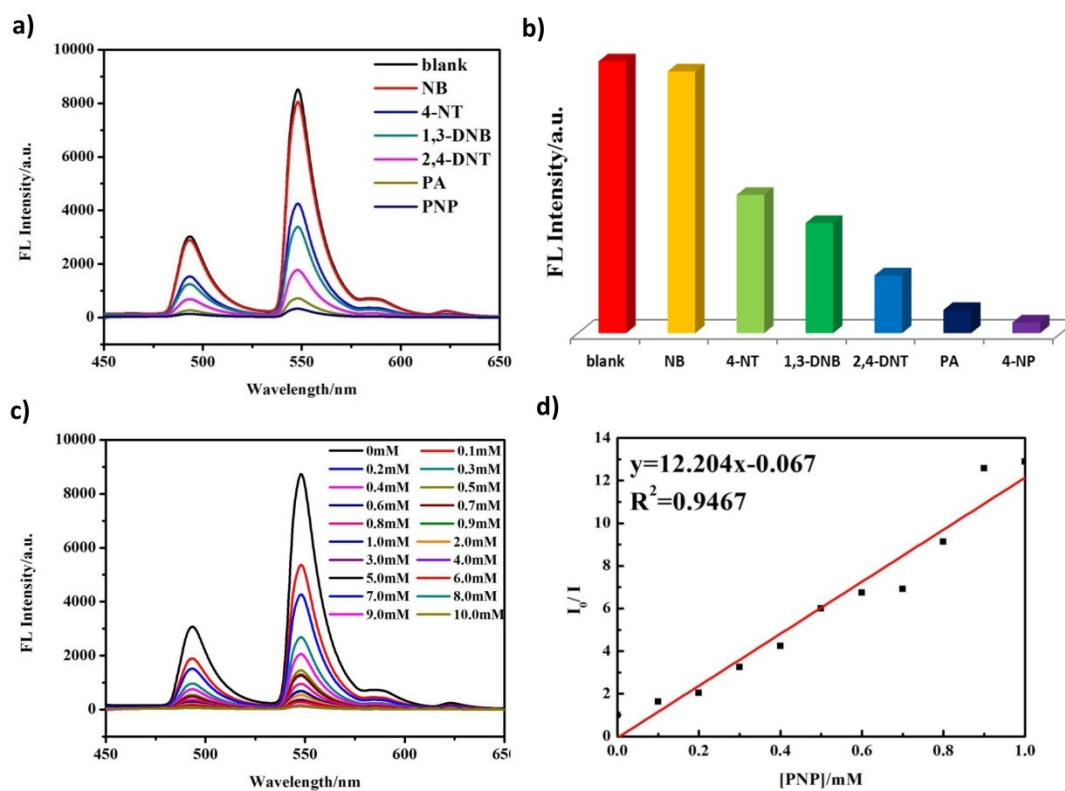

**Fig.S20** (a) Luminescence intensity at 548nm of complex<sub>2</sub> dispersed in the aqueous solutions of different nitro aromatic compounds upon excitation at 339nm. (b) Nitro aromatic compounds selectivity of complex<sub>2</sub> ( $I_0 / I$ ) in H<sub>2</sub>O. (c) Luminescence responses of complex<sub>2</sub> toward different concentrations of 4-NP (0-1.0Mm) in H<sub>2</sub>O ( $\lambda_{ex} = 339$ nm). (d) Stern-Volmer plot of  $I_0 / I$  versus increasing concentrations of 4-NP.

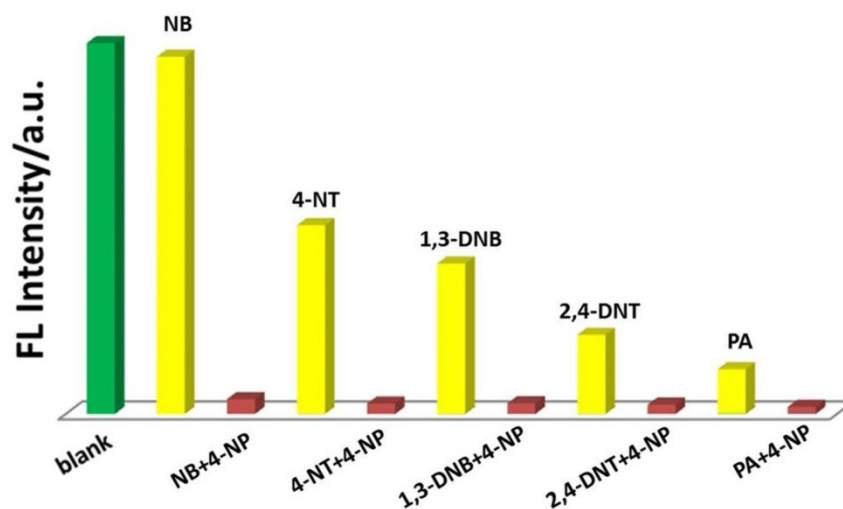

**Fig.S21** Luminescence intensity of the complex<sub>2</sub> dispersed in aqueous solution in the presence of different nitro aromatic compounds (yellow) or a mixture of other nitro aromatic compounds with 4-NP (red).

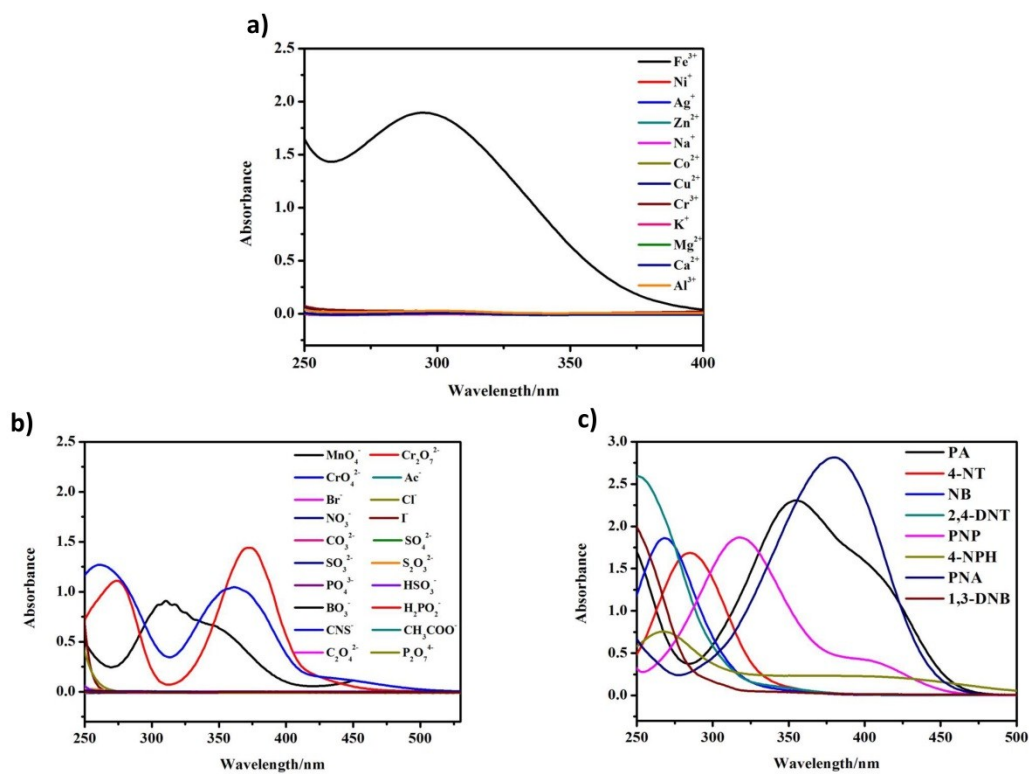

**Fig.S22** (a) UV-Vis spectra of different cations in aqueous solutions. (b) UV-Vis spectra of different anions in aqueous solutions. (c) UV-Vis spectra of different nitro aromatic compounds in aqueous solutions.

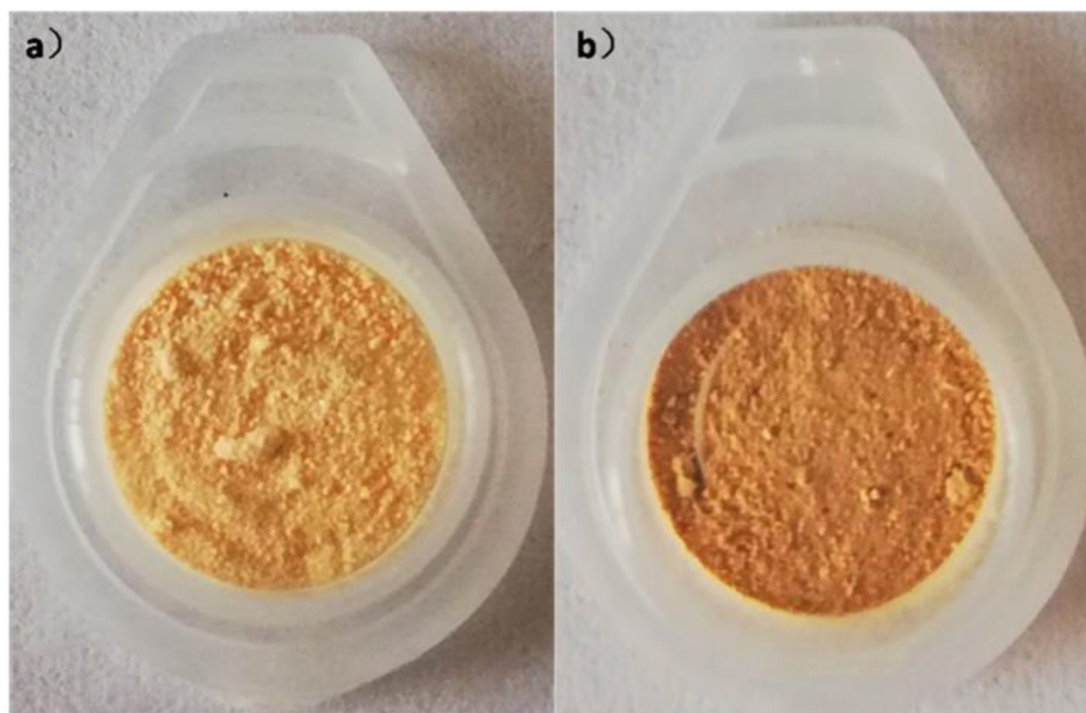

**Fig.S23** A solid sample immersed in an aqueous solution of MnO<sub>4</sub><sup>-</sup> from light yellow to brown.

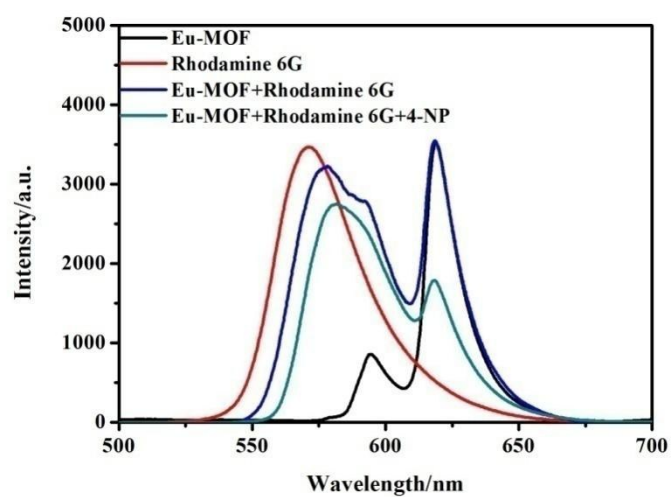

**Fig.S24** Steady-state emission spectra of complex $\mathbf{1}$  (1mg / 2mL), Rhodamine6G (3 $\mu$ M) and the mixture of complex $\mathbf{1}$  and Rhodamine6G before and after addition of 4-NP (1 $\times$ 10 $^{-3}$ mol/L) in DMAC, respectively.

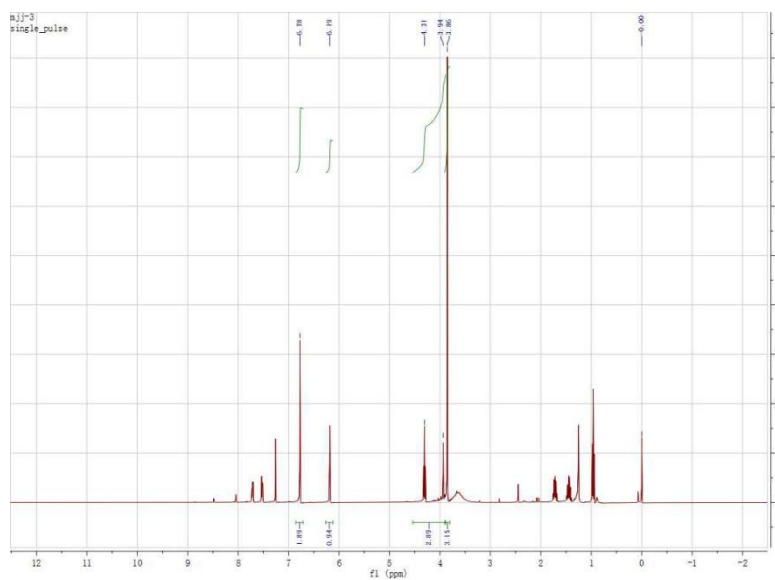

**Fig.S25**  $^1\text{H}$ NMR spectrum of  $\mathbf{1}$  in chloroform-d ( $\text{CDCl}_3\text{-d}$ ).

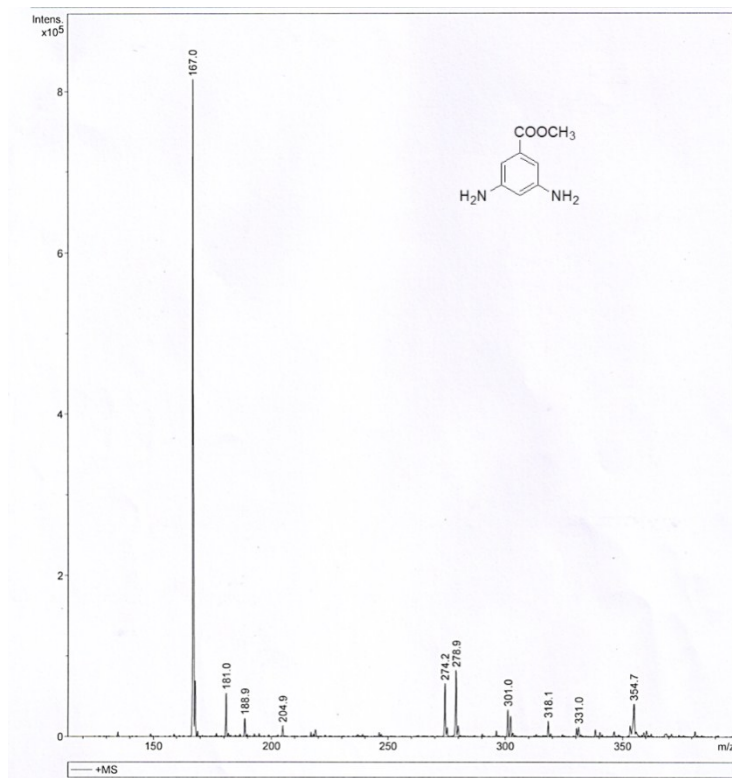

Fig.S26 ESI-MS of 1.

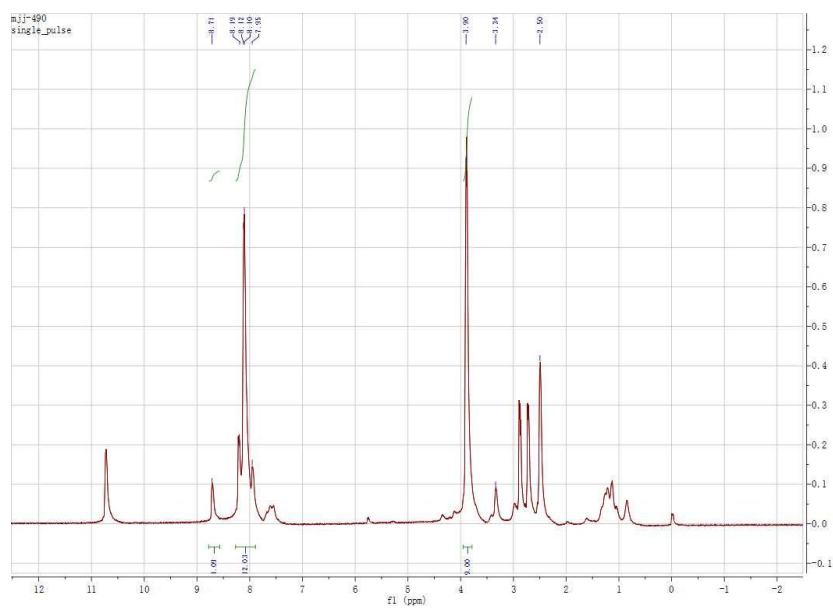

Fig.S27 <sup>1</sup>H NMR spectrum of 2 in DMSO-d<sub>6</sub>.

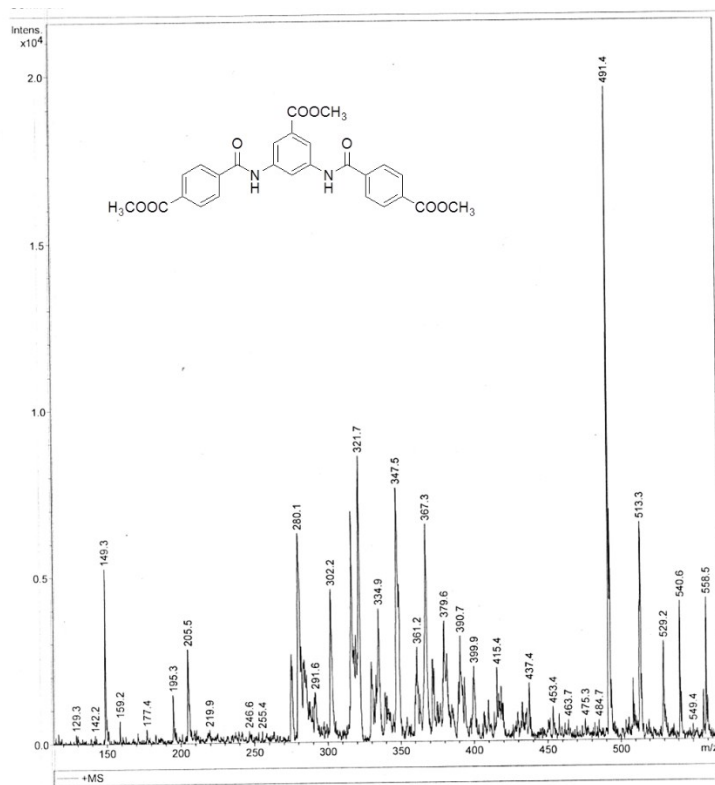

Fig.S28 ESI-MS of 2.

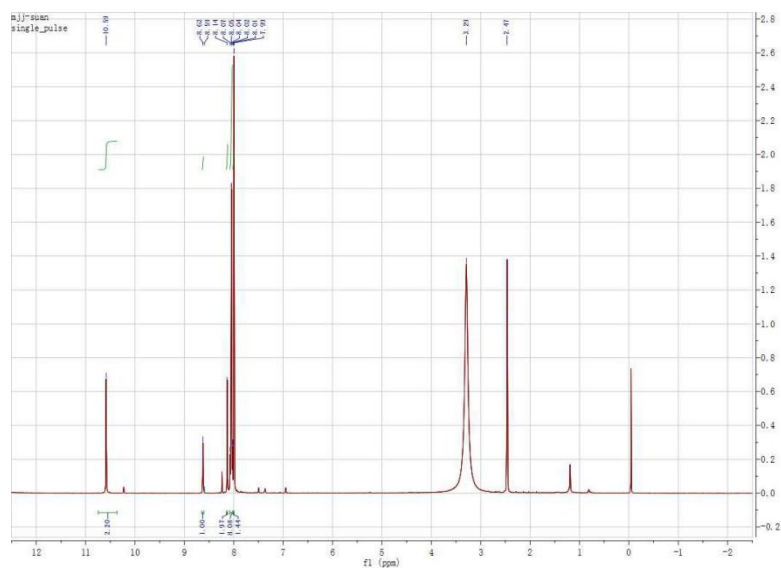

Fig.S29 <sup>1</sup>H NMR spectrum of H<sub>3</sub>L in DMSO-d<sub>6</sub>.



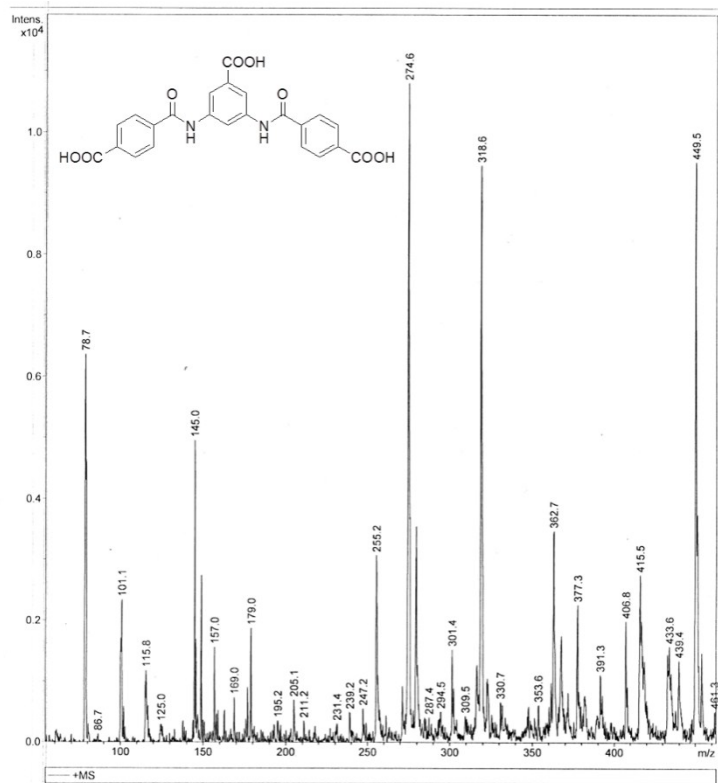

Fig.S30 ESI-MS of H<sub>3</sub>L.

**Table S2.** Luminescence lifetime and quantum yield of complexes1–2 and their analogues.

| materials                                | $\lambda_{\text{ex}}/\lambda_{\text{em}}(\text{nm})$ | $\tau$ ( $\mu\text{s}$ )       | $\phi(\%)$ |
|------------------------------------------|------------------------------------------------------|--------------------------------|------------|
| Ligand                                   | 353/464                                              |                                |            |
| Complexe1 (solid)                        | 394/619                                              | $\tau_1=341.46$                | 2.12       |
| Complexe2 (solid)                        | 339/548                                              | $\tau_1=281.29, \tau_2=721.97$ | 11.61      |
| Complexe1<br>(1mg/2mL)                   | 394/619                                              | $\tau_1=1121.91$               |            |
| Rhodamine6G (3 $\mu\text{M}$<br>in DMAC) | 330/572                                              | $\tau_1=6.77 \times 10^{-3}$   |            |

**Table S3.** Luminescence lifetime of complexes1-2 before and after detection  $\text{Fe}^{3+}$ ,  $\text{Cr}_2\text{O}_7^{2-}$ ,  $\text{MnO}_4^-$  and 4-NP.

| materials                                             | $\lambda_{\text{ex}}/\lambda_{\text{em}}(\text{nm})$ | $\tau$ ( $\mu\text{s}$ ) |
|-------------------------------------------------------|------------------------------------------------------|--------------------------|
| Complexe1 (1mg/2mL)                                   | 394/619                                              | $\tau_1=1121.91$         |
| Complexe1<br>(1mg/2mL) + $\text{Fe}^{3+}$             | 394/619                                              | $\tau_1=1087.74$         |
| Complexe1<br>(1mg/2mL) + $\text{Cr}_2\text{O}_7^{2-}$ | 394/619                                              | $\tau_1=1121.23$         |
| Complexe1<br>(1mg/2mL) + 4-NP                         | 394/619                                              | $\tau_1=1099.07$         |
| Complexe2 (1mg/2mL)                                   | 339/548                                              | $\tau_1=1155.23$         |
| Complexe2<br>(1mg/2mL) + $\text{Fe}^{3+}$             | 339/548                                              | $\tau_1=1153.14$         |
| Complexe2<br>(1mg/2mL) + $\text{MnO}_4^-$             | 339/548                                              | $\tau_1=1139.68$         |
| Complexe2<br>(1mg/2mL) + 4-NP                         | 339/548                                              | $\tau_1=1132.39$         |

**Table S4.** Summary of literature data on sensing Fe<sup>3+</sup> ions by various MOF based or related materials.

| MOFs and related materials                                                                                           | Analyte          | K <sub>sv</sub> (M <sup>-1</sup> ) | Detection Limit (mol/L) | Ref |
|----------------------------------------------------------------------------------------------------------------------|------------------|------------------------------------|-------------------------|-----|
| {[Eu <sub>2</sub> L <sub>1.5</sub> (H <sub>2</sub> O) <sub>2</sub> EtOH]·DMF} <sub>n</sub>                           | Fe <sup>3+</sup> | 2942                               | 1×10 <sup>-5</sup>      | 1   |
| Y <sub>0.99</sub> Eu <sub>0.01</sub> /Ad/BPDC                                                                        | Fe <sup>3+</sup> | 3400                               | -                       | 2   |
| [La(TPT)(DMSO) <sub>2</sub> ]·H <sub>2</sub> O                                                                       | Fe <sup>3+</sup> | 1.36×10 <sup>4</sup>               | -                       | 3   |
| Probes <b>L3</b>                                                                                                     | Fe <sup>3+</sup> | 3310                               | -                       | 4   |
| <b>PF5</b>                                                                                                           | Fe <sup>3+</sup> | -                                  | 9×10 <sup>-7</sup>      | 5   |
| {[Tb(TATAB)(H <sub>2</sub> O) <sub>2</sub> ]·NMP·H <sub>2</sub> O} <sub>n</sub>                                      | Fe <sup>3+</sup> | 3667                               | 1×10 <sup>-6</sup>      | 7   |
| [Tb(TAIP)(DMF) <sub>2</sub> ]                                                                                        | Fe <sup>3+</sup> | 8860                               | 7×10 <sup>-7</sup>      | 8   |
| [Gd <sub>6</sub> (L) <sub>3</sub> (HL) <sub>2</sub> (H <sub>2</sub> O) <sub>10</sub> ]18·H <sub>2</sub> O·x(solvent) | Fe <sup>3+</sup> | 7.98×10 <sup>4</sup>               | 1.67ppm                 | 9   |
| [Pb(BPDP)]                                                                                                           | Fe <sup>3+</sup> | 2.2×10 <sup>4</sup>                | -                       | 10  |
| [Pb <sub>3</sub> (BPDP) <sub>1.5</sub> (OOCCH <sub>2</sub> COOH) <sub>3</sub> ]                                      | Fe <sup>3+</sup> | 2.23×10 <sup>4</sup>               | -                       | 10  |
| {[Cd(5-asba)(bimb)] <sub>n</sub> }                                                                                   | Fe <sup>3+</sup> | 1.78×10 <sup>4</sup>               | 1ppm                    | 11  |
| <b>534-MOF-Tb</b>                                                                                                    | Fe <sup>3+</sup> | 5510                               | 1.3×10 <sup>-4</sup>    | 12  |
| Pb <sub>3</sub> O <sub>2</sub> L                                                                                     | Fe <sup>3+</sup> | 7.8×10 <sup>3</sup>                | 7.85×10 <sup>-6</sup>   | 13  |
| [Ln(ppda)(bdc) <sub>0.5</sub> (C <sub>2</sub> H <sub>5</sub> OH)(H <sub>2</sub> O)] <sub>n</sub>                     | Fe <sup>3+</sup> | 2.1×10 <sup>4</sup>                | 1×10 <sup>-5</sup>      | 15  |
| {[Zn <sub>3</sub> (mtrb) <sub>3</sub> (btc) <sub>2</sub> ]·3H <sub>2</sub> O} <sub>n</sub>                           | Fe <sup>3+</sup> | 6500                               | 1.78×10 <sup>-6</sup>   | 16  |
| {[Zn <sub>3</sub> (L)(OH)(H <sub>2</sub> O) <sub>5</sub> ]·NMP·2H <sub>2</sub> O} <sub>n</sub>                       | Fe <sup>3+</sup> | 4.7×10 <sup>4</sup>                | 1.98×10 <sup>-3</sup>   | 17  |
| Eu <sup>3+</sup> @MIL-53-COOH (Al)                                                                                   | Fe <sup>3+</sup> | 5120                               | 5×10 <sup>-5</sup>      | 19  |
| {[Cd(L)(4,4'-bipy)]·DMF·H <sub>2</sub> O} <sub>n</sub>                                                               |                  | 2.56×10 <sup>4</sup>               | 2.32×10 <sup>-6</sup>   |     |
| {[Cd <sub>2</sub> (L) <sub>2</sub> (bpe) <sub>2</sub> ]·3DMF·2.5H <sub>2</sub> O} <sub>n</sub>                       | Fe <sup>3+</sup> | 1.74×10 <sup>4</sup>               | 0.61×10 <sup>-6</sup>   | 25  |
| {[Cd(L)(bip)]·2DMF} <sub>n</sub>                                                                                     |                  | 3.39×10 <sup>4</sup>               | 1.24×10 <sup>-6</sup>   |     |
| [Eu(HL) <sub>1.5</sub> (H <sub>2</sub> O)(DMF)]·2H <sub>2</sub> O                                                    | Fe <sup>3+</sup> | 1×10 <sup>4</sup>                  | 1.03×10 <sup>-6</sup>   | 26  |
| [Tb(HL) <sub>1.5</sub> (H <sub>2</sub> O)(DMF)]·2H <sub>2</sub> O                                                    |                  | 9920                               | 1.04×10 <sup>-6</sup>   |     |
| {[Eu(L)(HCOO)]·H <sub>2</sub> O} <sub>n</sub>                                                                        | Fe <sup>3+</sup> | 7461                               | 1×10 <sup>-9</sup>      | 27  |
| {[Eu(L)(H <sub>2</sub> O)(DMA)] <sub>n</sub> }                                                                       | Fe <sup>3+</sup> | 2.03×10 <sup>4</sup>               | 1.41×10 <sup>-6</sup>   | 28  |
| {[Tb(L)(H <sub>2</sub> O)(DMA)] <sub>n</sub> }                                                                       | Fe <sup>3+</sup> | 2.11×10 <sup>4</sup>               | 1.01×10 <sup>-6</sup>   | 28  |
| [Cd(p-CNPhHIDC)(4,4'-bipy) <sub>0.5</sub> ] <sub>n</sub>                                                             | Fe <sup>3+</sup> | 1990                               | 5×10 <sup>-3</sup>      | 30  |
| [Zn(p-CNPhHIDC)(4,4'-bipy)] <sub>n</sub>                                                                             |                  | 1370                               |                         |     |
| [Eu(L)(H <sub>2</sub> O)]·1.5H <sub>2</sub> O                                                                        | Fe <sup>3+</sup> | 66070                              | 0.87×10 <sup>-6</sup>   | 32  |
| [Zn(PrOip)(bpp)(H <sub>2</sub> O)] <sub>n</sub>                                                                      |                  | 4404                               | 6.676×10 <sup>-5</sup>  |     |
| {[Zn( <sup>n</sup> BuOip)(bpp)]·2H <sub>2</sub> O} <sub>n</sub>                                                      | Fe <sup>3+</sup> | 1474                               | 5.442×10 <sup>-5</sup>  | 35  |
| {[Zn( <sup>i</sup> BuOip)(bpp)]·2H <sub>2</sub> O} <sub>n</sub>                                                      |                  | 1714                               | 1.773×10 <sup>-5</sup>  |     |
| [Zn <sub>2</sub> (L) <sub>2</sub> (TPA)]·2H <sub>2</sub> O                                                           | Fe <sup>3+</sup> | 6400                               | 3.84×10 <sup>-6</sup>   | 36  |
| [Tb <sub>4</sub> L <sub>4</sub> (NO <sub>3</sub> ) <sub>2</sub> (Piv) <sub>2</sub> ]·2CH <sub>3</sub> OH             | Fe <sup>3+</sup> | 1.86×10 <sup>4</sup>               | 1×10 <sup>-5</sup>      | 37  |
| [Eu(IMS1) <sub>2</sub> Cl]·4H <sub>2</sub> O                                                                         | Fe <sup>3+</sup> | 5873.4                             | 2.3×10 <sup>-5</sup>    | 38  |
| {[Zn(L) <sub>0.5</sub> (bimb)]·2H <sub>2</sub> O·0.5(CH <sub>3</sub> ) <sub>2</sub> NH} <sub>n</sub>                 |                  | 6.28×10 <sup>4</sup>               | 0.48×10 <sup>-6</sup>   |     |
| {[Zn(L) <sub>0.5</sub> (bimmb)]·2H <sub>2</sub> O} <sub>n</sub>                                                      | Fe <sup>3+</sup> | 4.07×10 <sup>4</sup>               | 0.74×10 <sup>-6</sup>   | 41  |
| {[Zn(L) <sub>0.5</sub> (btdpe)]·H <sub>2</sub> O} <sub>n</sub>                                                       |                  | 5.1×10 <sup>4</sup>                | 0.59×10 <sup>-6</sup>   |     |
| [Zn(L) <sub>0.5</sub> (bidpe)] <sub>n</sub>                                                                          |                  | 4.67×10 <sup>4</sup>               | 0.64×10 <sup>-6</sup>   |     |
| {Zn <sub>2</sub> (NO <sub>3</sub> ) <sub>2</sub> (4,4'-bpy) <sub>2</sub> (TBA)}                                      | Fe <sup>3+</sup> | 7×10 <sup>4</sup>                  | 7.18×10 <sup>-6</sup>   | 42  |

**Table S5.** Summary of literature data on sensing  $\text{Cr}_2\text{O}_7^{2-}$  ions by various MOF based or related materials.

| MOFs and related materials                                                                                            | Analyte                      | $K_{sv}(\text{M}^{-1})$ | Detection Limit (mol/L) | Ref |
|-----------------------------------------------------------------------------------------------------------------------|------------------------------|-------------------------|-------------------------|-----|
| $\{\{\text{Eu}_2\text{L}_{1.5}(\text{H}_2\text{O})_2\text{EtOH}\}\cdot\text{DMF}\}_n$                                 | $\text{Cr}_2\text{O}_7^{2-}$ | 1526                    | $1\times 10^{-5}$       | 1   |
| $\text{Y}_{0.99}\text{Eu}_{0.01}/\text{Ad}/\text{BPDC}$                                                               | $\text{Cr}_2\text{O}_7^{2-}$ | 7200                    | -                       | 6   |
| $\{\{\text{Tb}(\text{TATAB})(\text{H}_2\text{O})_2\}\cdot\text{NMP}\cdot\text{H}_2\text{O}\}_n$                       | $\text{Cr}_2\text{O}_7^{2-}$ | 11106                   | $5\times 10^{-6}$       | 7   |
| <b>534-MOF-Tb</b>                                                                                                     | $\text{Cr}_2\text{O}_7^{2-}$ | $1.37\times 10^4$       | $1.4\times 10^{-4}$     | 12  |
| $[\text{Eu}_2(\text{H}_2\text{O})(\text{DCPA})_3]_n$                                                                  | $\text{Cr}_2\text{O}_7^{2-}$ | 8700                    | -                       | 14  |
| $[\text{Ln}(\text{ppda})(\text{bdc})_{0.5}(\text{C}_2\text{H}_5\text{OH})(\text{H}_2\text{O})]_n$                     | $\text{Cr}_2\text{O}_7^{2-}$ | 4030                    | $1\times 10^{-3}$       | 15  |
| $\{\{\text{Zn}_3(\text{mtrb})_3(\text{btc})_2\}\cdot 3\text{H}_2\text{O}\}_n$                                         | $\text{Cr}_2\text{O}_7^{2-}$ | 4620                    | $2.83\times 10^{-6}$    | 16  |
| $\{\{\text{Zn}_3(\text{L})(\text{OH})(\text{H}_2\text{O})_5\}\cdot\text{NMP}\cdot 2\text{H}_2\text{O}\}_n$            | $\text{Cr}_2\text{O}_7^{2-}$ | $6.6\times 10^4$        | $1.19\times 10^{-3}$    | 17  |
| $[\text{Zn}(\text{L})(\text{H}_2\text{O})]\cdot\text{H}_2\text{O}$                                                    | $\text{Cr}_2\text{O}_7^{2-}$ | $2.07\times 10^4$       | $3.53\times 10^{-6}$    | 21  |
| $[\text{Cd}(\text{TIPA})_2(\text{ClO}_4^-)_2]\cdot(\text{DMF})_3(\text{H}_2\text{O})$                                 | $\text{Cr}_2\text{O}_7^{2-}$ | $7.15\times 10^4$       | 8ppb                    | 24  |
| $\{\{\text{Cd}(\text{L})(4,4\text{-bpy})\}\cdot\text{DMF}\cdot\text{H}_2\text{O}\}_n$                                 |                              | 2830                    | $7.1\times 10^{-6}$     |     |
| $\{\{\text{Cd}_2(\text{L})_2(\text{bpe})_2\}\cdot 3\text{DMF}\cdot 2.5\text{H}_2\text{O}\}_n$                         | $\text{Cr}_2\text{O}_7^{2-}$ | 3700                    | $1.65\times 10^{-6}$    | 25  |
| $\{\{\text{Cd}(\text{L})(\text{bibp})\}\cdot 2\text{DMF}\}_n$                                                         |                              | 6150                    | $5.3\times 10^{-6}$     |     |
| $\{\{\text{Eu}(\text{L})(\text{HCOO})\}\cdot\text{H}_2\text{O}\}_n$                                                   | $\text{Cr}_2\text{O}_7^{2-}$ | 31048                   | $2\times 10^{-9}$       | 27  |
| $\{\{\text{Eu}_2\text{Na}(\text{Hpddb})(\text{pddb})_2(\text{CH}_3\text{COO})_2\}\cdot 2.5(\text{DMA})\}_n$           | $\text{Cr}_2\text{O}_7^{2-}$ | $6.45\times 10^3$       | $5.35\times 10^{-6}$    | 29  |
| $[\text{Cd}(\text{L})_2(\text{H}_2\text{O})_2]_n$                                                                     | $\text{Cr}_2\text{O}_7^{2-}$ | $5.1\times 10^4$        | $3.41\times 10^{-5}$    | 31  |
| $[\text{Eu}(\text{L})(\text{H}_2\text{O})]\cdot 1.5\text{H}_2\text{O}$                                                | $\text{Cr}_2\text{O}_7^{2-}$ | $5.18\times 10^4$       | $1.25\times 10^{-6}$    | 32  |
| $[\text{Cd}(\text{TPA})(\text{DIB})]_n$                                                                               |                              | $3.6\times 10^4$        | $1.2\times 10^{-6}$     |     |
| $[\text{Cd}(\text{TPA})(\text{BIYB})]_n$                                                                              | $\text{Cr}_2\text{O}_7^{2-}$ | $1.4\times 10^7$        | $4.1\times 10^{-7}$     | 33  |
| $\{\{\text{Eu}(\text{bpydb})_3(\text{HCOO})(\text{OH})_2(\text{DMF})\}\cdot 3\text{DMF}\cdot 2\text{H}_2\text{O}\}_n$ | $\text{Cr}_2\text{O}_7^{2-}$ | $1.33\times 10^4$       | $5\times 10^{-7}$       | 34  |
| $[\text{Zn}(\text{PrOip})(\text{bpp})(\text{H}_2\text{O})]_n$                                                         |                              | 2237                    | $0.1314\times 10^{-5}$  |     |
| $\{\{\text{Zn}(\text{nBuOip})(\text{bpp})\}\cdot 2\text{H}_2\text{O}\}_n$                                             | $\text{Cr}_2\text{O}_7^{2-}$ | 4512                    | $1.778\times 10^{-5}$   | 35  |
| $\{\{\text{Zn}(\text{iBuOip})(\text{bpp})\}\cdot 2\text{H}_2\text{O}\}_n$                                             |                              | 1813                    | $1.676\times 10^{-5}$   |     |
| $[\text{Zn}_2(\text{L})_2(\text{TPA})]\cdot 2\text{H}_2\text{O}$                                                      | $\text{Cr}_2\text{O}_7^{2-}$ | 6050                    | $3.8\times 10^{-6}$     | 36  |
| $[\text{Tb}_4\text{L}_4(\text{NO}_3)_2(\text{Piv})_2]\cdot 2\text{CH}_3\text{OH}$                                     | $\text{Cr}_2\text{O}_7^{2-}$ | $7.44\times 10^3$       | $2.7\times 10^{-5}$     | 37  |
| $[(\text{CH}_3)_2\text{NH}_2][\text{In}(\text{TNB})_{4/3}]\cdot (2\text{DMF})(3\text{H}_2\text{O})$                   | $\text{Cr}_2\text{O}_7^{2-}$ | $5.33\times 10^4$       | $4.5\times 10^{-5}$     | 40  |
| $\{\{\text{Zn}(\text{L})_{0.5}(\text{bimb})\}\cdot 2\text{H}_2\text{O}\cdot 0.5(\text{CH}_3)_2\text{NH}\}_n$          |                              | $5.68\times 10^4$       | $0.53\times 10^{-6}$    |     |
| $\{\{\text{Zn}(\text{L})_{0.5}(\text{bimmb})\}\cdot 2\text{H}_2\text{O}\}_n$                                          | $\text{Cr}_2\text{O}_7^{2-}$ | $7.35\times 10^4$       | $0.41\times 10^{-6}$    | 41  |
| $\{\{\text{Zn}(\text{L})_{0.5}(\text{btdpe})\}\cdot\text{H}_2\text{O}\}_n$                                            |                              | $5.55\times 10^4$       | $0.54\times 10^{-6}$    |     |
| $[\text{Zn}(\text{L})_{0.5}(\text{bidpe})]_n$                                                                         |                              | $6.2\times 10^4$        | $0.48\times 10^{-6}$    |     |

**Table S6.** Summary of literature data on sensing  $\text{MnO}_4^-$  ions by various MOF based or related materials.

| MOFs and related materials                                                                                      | Analyte          | $K_{sv}(\text{M}^{-1})$ | Detection Limit (mol/L) | Ref |
|-----------------------------------------------------------------------------------------------------------------|------------------|-------------------------|-------------------------|-----|
| [Pb(BPDP)]                                                                                                      | $\text{MnO}_4^-$ | $9.71 \times 10^4$      | -                       | 10  |
| $[\text{Pb}_3(\text{BPDP})_{1.5}(\text{OOC}_6\text{H}_4\text{COOH})_3]$                                         |                  | $1.1 \times 10^4$       |                         |     |
| <b>534-MOF-Tb</b>                                                                                               | $\text{MnO}_4^-$ | $6.63 \times 10^4$      | $3.4 \times 10^{-4}$    | 12  |
| $\{[\text{Zn}_3(\text{L})(\text{OH})(\text{H}_2\text{O})_5] \cdot \text{NMP} \cdot 2\text{H}_2\text{O}\}_n$     | $\text{MnO}_4^-$ | $1.1 \times 10^4$       | $1.81 \times 10^{-3}$   | 17  |
| CDs@MOF(Eu)                                                                                                     | $\text{MnO}_4^-$ | $3.64 \times 10^4$      | $6.8 \times 10^{-5}$    | 20  |
| $\{[\text{Eu}_2\text{Na}(\text{Hpddb})(\text{pddb})_2(\text{CH}_3\text{COO})_2] \cdot 2.5(\text{DMA})\}_n$      | $\text{MnO}_4^-$ | 2840                    | $2.99 \times 10^{-6}$   | 29  |
| $[\text{Cd}(\text{L})_2(\text{H}_2\text{O})_2]_n$                                                               | $\text{MnO}_4^-$ | $2.2 \times 10^4$       | $1.73 \times 10^{-4}$   | 31  |
| $\{[\text{Eu}(\text{bpydb})_3(\text{HCOO})(\text{OH})_2(\text{DMF})] 3\text{DMF} \cdot 2\text{H}_2\text{O}\}_n$ | $\text{MnO}_4^-$ | $2.45 \times 10^4$      | $1 \times 10^{-7}$      | 34  |

**Table S7.** Summary of literature data on sensing 4-NP by various MOF based or related materials.

| MOFs and related materials                                                                                            | Analyte | $K_{sv}(\text{M}^{-1})$ | Detection Limit (mol/L) | Ref |
|-----------------------------------------------------------------------------------------------------------------------|---------|-------------------------|-------------------------|-----|
| $\{[\text{Tb}(\text{TATAB})(\text{H}_2\text{O})_2] \cdot \text{NMP} \cdot \text{H}_2\text{O}\}_n$                     | 4-NP    | $3.7 \times 10^5$       | 140ppm                  | 7   |
| [Tb(TAIP)(DMF) <sub>2</sub> ]                                                                                         | 4-NP    | $3.35 \times 10^4$      | $6 \times 10^{-7}$      | 8   |
| $[\text{Gd}_6(\text{L})_3(\text{HL})_2(\text{H}_2\text{O})_{10}] 18 \cdot \text{H}_2\text{O} \cdot x(\text{solvent})$ | 4-NP    | $8.4 \times 10^3$       | 1.7ppm                  | 9   |
| [Pb(BPDP)]                                                                                                            | 4-NP    | $6.45 \times 10^4$      | $6 \times 10^{-4}$      | 10  |
| $[\text{Pb}_3(\text{BPDP})_{1.5}(\text{OOC}_6\text{H}_4\text{COOH})_3]$                                               |         | $4.2 \times 10^4$       | $7 \times 10^{-4}$      |     |
| $[\text{Er}_2(\text{C}_{10}\text{H}_4\text{O}_4\text{S}_2)_3(\text{H}_2\text{O})_6]_n$                                | 4-NP    | 1179                    | -                       | 18  |
| $[\text{Zn}(\text{L})(\text{H}_2\text{O})] \cdot \text{H}_2\text{O}$                                                  | 4-NP    | $1.25 \times 10^4$      | $3.74 \times 10^{-6}$   | 21  |
| $[\text{NaEu}_2(\text{TATAB})_2(\text{DMF})_3] \cdot \text{OH}$                                                       | 4-NP    | $0.68 \text{ppm}^{-1}$  | 80ppm                   | 22  |
| $[\text{Zn}_2(1,4\text{-bdc})(1,4\text{-Hbdc})_2(\text{NI-bpy-34})_2]$                                                | 4-NP    | 1000                    | $13.25 \times 10^{-6}$  | 23  |
| $[\text{Zn}_2(2,6\text{-ndc})(2,6\text{-Hndc})_2(\text{NI-bpy-34})_2] \cdot \text{H}_2\text{O}$                       |         | 4230                    | $2.91 \times 10^{-6}$   |     |
| $[\text{Zn}(\text{Hbtc})(\text{NI-bpy-34})(\text{H}_2\text{O})] \cdot \text{H}_2\text{O}$                             |         | 2380                    | $28.18 \times 10^{-6}$  |     |
| $\{[\text{Eu}(\text{L})(\text{HCOO})] \cdot \text{H}_2\text{O}\}_n$                                                   | 4-NP    | 13784                   | $3 \times 10^{-9}$      | 27  |
| $[\text{Eu}(\text{L})(\text{H}_2\text{O})] \cdot 1.5\text{H}_2\text{O}$                                               | 4-NP    | 75130                   | $0.92 \times 10^{-6}$   | 32  |
| $[\text{In}_3\text{O}(\text{ADBA})_3(\text{H}_2\text{O})_3](\text{NO}_3) \cdot (\text{H}_2\text{O})_6$                | 4-NP    | $5.1 \times 10^4$       | -                       | 39  |

## Notes and references

1. W. Liu, X. Huang, C. Xu, C. Chen, L. Yang, W. Dou, W. Chen, H. Yang and W. Liu, *Chem. Eur. J.*, 2016, **22**, 18769-18776.
2. X. Shen and B. Yan, *RSC. Adv.*, 2015, **5**, 6752-6757.
3. C. Zhang, Y. Yan, Q. Pan, L. Sun, H. He, Y. Liu, Z. Liang and J. Li, *Dalton. Trans.*, 2015, **44**, 13340-1346.
4. P. Kumar, V. Kumar and R. Gupta, *RSC. Adv.*, 2015, **5**, 97874-97882.
5. T.-B. Wei, X.-B. Cheng, H. Li, F. Zheng, Q. Lin, H. Yao and Y.-M. Zhang, *RSC. Adv.*, 2016, **6**, 20987-20993.
6. W. Wang, Z. Xiao, H. Lin, R. Wang, L. Zhang and D. Sun, *RSC. Adv.*, 2016, **6**, 16575-16580.
7. G.-X. Wen, M.-L. Han, X.-Q. Wu, Y.-P. Wu, W.-W. Dong, J. Zhao, D.-S. Li and L.-F. Ma, *Dalton. Trans.*, 2016, **45**, 15492-15499.
8. D. Wang, L. Sun, C. Hao, Y. Yan and Z. Liang, *RSC. Adv.*, 2016, **6**, 57828-57834.
9. Q.-H. Tan, Y.-Q. Wang, X.-Y. Guo, H.-T. Liu and Z.-L. Liu, *RSC. Adv.*, 2016, **6**, 61725-61731.
10. B. Xing, H.-Y. Li, Y.-Y. Zhu, Z. Zhao, Z.-G. Sun, D. Yang and J. Li, *RSC. Adv.*, 2016, **6**, 110255-110265.
11. Y.-J. Yang, M.-J. Wang and K.-L. Zhang, *J. Mater. Chem. C.*, 2016, **4**, 11404-11418.
12. M. Chen, W.-M. Xu, J.-Y. Tian, H. Cui, J.-X. Zhang, C.-S. Liu and M. Du, *J. Mater. Chem. C.*, 2017, **5**, 2015-2021.
13. X. Luo, X. Zhang, Y. Duan, X. Wang and J. Zhao, *Dalton. Trans.*, 2017, **46**, 6303-6311.
14. H. He, S.-H. Chen, D.-Y. Zhang, R. Hao, C. Zhang, E.-C. Yang and X.-J. Zhao, *Dalton. Trans.*, 2017, **46**, 13502-13509.
15. X. Zhang, Z. Zhan, X. Liang, C. Chen, X. Liu, Y. Jia and M. Hu, *Dalton. Trans.*, 2018, **47**, 3272-3282.
16. Y.-Q. Zhang, V.-A. Blatov, T.-R. Zheng, C.-H. Yang, L.-L. Qian, K. Li, B.-L. Li and B. Wu, *Dalton. Trans.*, 2018, **47**, 6189-6198.
17. Y.-T. Yan, W.-Y. Zhang, F. Zhang, F. Cao, R.-F. Yang, Y.-Y. Wang and L. Hou, *Dalton. Trans.*, 2018, **47**, 1682-1692.
18. J.-D. Einkauf, R.-E. Ortega, L. Mathivathanan and D.-T. de Lill, *New. J. Chem.*, 2017, **41**, 10929-10934.
19. Y. Zhou, H.-H. Chen and B. Yan, *J. Mater. Chem. A.*, 2014, **2**, 13691-13697.
20. X. Fu, R. Lv, J. Su, H. Li, B. Yang, W. Gu and X. Liu, *RSC. Adv.*, 2018, **8**, 4766-4772.
21. X.-Y. Guo, F. Zhao, J.-J. Liu, Z.-L. Liu and Y.-Q. Wang, *J. Mater. Chem. A.*, 2017, **5**, 20035-20043.
22. M.-L. Han, G.-X. Wen, W.-W. Dong, Z.-H. Zhou, Y.-P. Wu, J. Zhao, D.-S. Li, L.-F. Ma and X. Bu, *J. Mater. Chem. C.*, 2017, **5**, 8469-8474.
23. M.-J. Tsai, C.-Y. Li and J.-Y. Wu, *CrystEngComm.*, 2018, **20**, 6762-6774.

24. H.-R. Fu, Y. Zhao, Z. Zhou, X.-G. Yang and L.-F. Ma, *Dalton. Trans.*, 2018, **47**, 3725-3732.
25. Z. Chen, X. Mi, J. Lu, S. Wang, Y. Li, J. Dou and D. Li, *Dalton. Trans.*, 2018, **47**, 6240-6249.
26. F. Zhao, X.-Y. Guo, Z.-P. Dong, Z.-L. Liu and Y.-Q. Wang, *Dalton. Trans.*, 2018, **47**, 8972-8982.
27. Y. Liu, J. Ma, C. Xu, Y. Yang, M. Xia, H. Jiang and W. Liu, *Dalton. Trans.*, 2018, **47**, 13543-13549.
28. L. Liu, Y. Wang, R. Lin, Z. Yao, Q. Lin, L. Wang, Z. Zhang and S. Xiang, *Dalton. Trans.*, 2018, **47**, 16190-16196.
29. S. Xu, J.-J. Shi, B. Ding, Z.-Y. Liu, X.-G. Wang, X.-J. Zhao and E.-C. Yang, *Dalton. Trans.*, 2019, **48**, 1823-1834.
30. J. Zhang, L. Zhao, Y. Liu, M. Li, G. Li and X. Meng, *New. J. Chem.*, 2018, **42**, 6839-6847.
31. Y.-T. Yan, F. Cao, W.-Y. Zhang, S.-S. Zhang, F. Zhang and Y.-Y. Wang, *New. J. Chem.*, 2018, **42**, 9865-9875.
32. Y. Tao, P. Zhang, J. Liu, X. Chen, X. Guo, H. Jin, J. Chai, L. Wang and Y. Fan, *New. J. Chem.*, 2018, **42**, 19485-19493.
33. X. Wang, Y. Han, X.-X. Han, X. Hou, J.-J. Wang and F. Fu, *New. J. Chem.*, 2018, **42**, 19844-19852.
34. S.-L. Yang, Y.-Y. Yuan, P.-P. Sun, T. Lin, C.-X. Zhang and Q.-L. Wang, *New. J. Chem.*, 2018, **42**, 20137-20143.
35. R.-R. Zhu, T. Wang, D.-W. Wang, T. Yan, Q. Wang, H.-X. Li, Z. Xue, J. Zhou, L. Du and Q.-H. Zhao, *New. J. Chem.*, 2019, **43**, 1494-1504.
36. X.-Y. Guo, Z.-P. Dong, F. Zhao, Z.-L. Liu and Y.-Q. Wang, *New. J. Chem.*, 2019, **43**, 2353-2361.
37. Y. Qin, Y. Ge, S. Zhang, H. Sun, Y. Jing, Y. Li and W. Liu, *RSC. Adv.*, 2018, **8**, 12641-12652.
38. Y.-Q. Huang, H.-Y. Chen, Y. Wang, Y.-H. Ren, Z.-G. Li, L.-C. Li and Y. Wang, *RSC. Adv.*, 2018, **8**, 21444-21450.
39. X. Liu, B. Liu, G. Li and Y. Liu, *J. Mater. Chem. A.*, 2018, **6**, 17177-17185.
40. H.-R. Fu, Y. Zhao, T. Xie, M.-L. Han, L.-F. Ma and S.-Q. Zang, *J. Mater. Chem. C.*, 2018, **6**, 6440-6448.
41. C. Xu, C. Bi, Z. Zhu, R. Luo, X. Zhang, D. Zhang, C. Fan, L. Cui and Y. Fan, *CrystEngComm.*, 2019, **21**, 2333-2344.
42. X. Zhang, X. Zhuang, N. Zhang, C. Ge, X. Luo, J. Li, J. Wu, Q. Yang and R. Liu, *CrystEngComm.*, 2019, **21**, 1948-1955.
